# Supplementary material for: A Convenient Chemoenzymatic Preparation of Chimeric Macrocyclic Peptide Antibiotics with Potent Activity against Gram-Negative Pathogens
Source: PubMed Central journal article supplement — J Med Chem. 2021 Jul 20;64(15):10890–9. doi: 10.1021/acs.jmedchem.1c00176 (PMC8365600; doi:10.1021/acs.jmedchem.1c00176), 2021-07-20
Supplement: jm1c00176_si_001.pdf [file jm1c00176_si_001.pdf]

Supporting information for:

# **A convenient chemoenzymatic preparation of chimeric macrocyclic peptide antibiotics with potent activity against Gram-negative pathogens**

Thomas M. Wood,<sup>1,2,‡</sup> Cornelis J. Slingerland,<sup>1,‡</sup> Nathaniel I. Martin<sup>1,\*</sup>

<sup>1</sup>Biological Chemistry Group, Institute of Biology Leiden, Leiden University, Sylviusweg 72, 2333 BE Leiden, The Netherlands. \*n.i.martin@biology.leidenuniv.nl

<sup>2</sup>Department of Chemical Biology & Drug Discovery, Utrecht Institute for Pharmaceutical Sciences, Utrecht University, Universiteitsweg 99, 3584 CG Utrecht, The Netherlands.

<sup>‡</sup>These authors contributed equally to this work.

## **Table of contents**

|       |                                                               |
|-------|---------------------------------------------------------------|
| S2    | Reagents and General Methods                                  |
| S3-4  | Synthesis of PMEN/PMBN and PMEH azide building blocks         |
| S4    | Protocol for preparation of triazoles <b>9a-c</b> , <b>12</b> |
| S5    | Antibacterial assay                                           |
| S5    | HRMS analysis for new compounds                               |
| S6-11 | Analytical HPLC traces                                        |
| S12   | References                                                    |

### **Reagents and General Procedures**

All reagents employed were of American Chemical Society (ACS) grade or finer and were used without further purification unless otherwise stated. Fmoc-Dab(Boc)-OH, Fmoc-D-Dab(Boc)-OH, Fmoc-Hse(Trt)-OH, Fmoc-Tle-OH and Fmoc-Glu-OAllyl were obtained from Combi-Blocks. For compound characterization HRMS analysis was performed on a Shimadzu Nexera X2 UHPLC system with a Waters Acquity HSS C18 column (2.1 × 100 mm, 1.8 μm) at 30 °C and equipped with a diode array detector. The following solvent system, at a flow rate of 0.5 mL/min, was used: solvent A, 0.1 % formic acid in water; solvent B, 0.1 % formic acid in acetonitrile. Gradient elution was as follows: 95:5 (A/B) for 1 min, 95:5 to 15:85 (A/B) over 6 min, 15:85 to 0:100 (A/B) over 1 min, 0:100 (A/B) for 3 min, then reversion back to 95:5 (A/B) for 3 min. This system was connected to a Shimadzu 9030 QTOF mass spectrometer (ESI ionisation) calibrated internally with Agilent's API-TOF reference mass solution kit (5.0 mM purine, 100.0 mM ammonium trifluoroacetate and 2.5 mM hexakis(1H,1H,3H-tetrafluoropropoxy)phosphazine) diluted to achieve a mass count of 10000.

Purity of the peptides was confirmed to be ≥ 95% by analytical RP-HPLC using a Shimadzu Prominence-i LC-2030 system with a Dr. Maisch ReproSil Gold 120 C18 column (4.6 × 250 mm, 5 μm) at 30 °C and equipped with a UV detector monitoring at 214 nm. The following solvent system, at a flow rate of 1 mL/min, was used: solvent A, 0.1 % TFA in water/acetonitrile, 95/5; solvent B, 0.1 % TFA in water/acetonitrile, 5/95. Gradient elution was as follows: 95:5 (A/B) for 2 min, 95:5 to 0:100 (A/B) over 13 min, 0:100 (A/B) for 2 min, then reversion back to 95:5 (A/B) over 1 min, 95:5 (A/B) for 2 min.

The compounds were purified via preparative HPLC using a BESTA-Technik system with a Dr. Maisch Reprosil Gold 120 C18 column (25 × 250 mm, 10 μm) and equipped with a ECOM Flash UV detector monitoring at 214 nm. The following solvent system, at a flow rate of 12 mL/min, was used: solvent A, 0.1 % TFA in water/acetonitrile 95/5; solvent B, 0.1 % TFA in water/acetonitrile 5/95. Gradient elution was as follows: 95:5 (A/B) for 2 min, 95:5 to 0:100 (A/B) over 45 min, 0:100 (A/B) for 2 min, then reversion back to 95:5 (A/B) over 1 min, 95:5 (A/B) for 2 min.

## Synthesis

### *Tetra-Boc-protected PMEN/PMBN (4a,b)*

PMEN-Boc<sub>4</sub> (**4a**) and PMBN-Boc<sub>4</sub> (**4b**) were prepared as previously described for PMBN-Boc<sub>4</sub>.<sup>1</sup>

### *PMEN azide derivatives (8a-c)*

#### *PMEN-C<sub>2</sub>-N<sub>3</sub> (8a)*

PMEN-Boc<sub>4</sub> (0.45 g, 0.34 mmol) was dissolved in DCM and DMF (8:2 v:v, 10 mL). In a separate flask, 2-azidoacetic acid (68 mg, 0.68 mmol) and BOP (0.30 g, 0.68 mmol) were dissolved in DCM (8 mL). The mixture of 2-azidoacetic acid and BOP was then added to the PMEN-Boc<sub>4</sub>, followed by addition of DIPEA (0.24 mL, 1.4 mmol). The reaction was left to stir overnight at RT under N<sub>2</sub> atmosphere. After completion, the solvent was evaporated and the residue treated with TFA/TIPS/H<sub>2</sub>O (95:2.5:2.5, 8 mL) for 1.5 hours. The reaction mixture was added to ice-cold MTBE/PE (2/1, 120 mL). The resulting precipitate was washed with MTBE/PE (2/1). Crude peptide was lyophilized from t-BuOH/H<sub>2</sub>O and HPLC purified. Yield: 130 mg, 0.13 mmol, 39%.

#### *PMEN-C<sub>5</sub>-N<sub>3</sub> (8b)*

Compound was prepared as PMEN-C<sub>2</sub>-N<sub>3</sub>, starting from PMEN(Boc)<sub>4</sub> and 5-azidopentanoic. Yield: 85 mg, 0.08 mmol, 36%.

#### *PMEN-(PEG)3-N<sub>3</sub> (8c)*

Compound was prepared as PMEN-C<sub>2</sub>-N<sub>3</sub>, starting from PMEN(Boc)<sub>4</sub> and 3-(2-(2-(2-azidoethoxy)ethoxy)ethoxy)propanoic acid. Yield: 120 mg, 0.11 mmol, 43%.

### *Tri-Boc-protected PME<sub>H</sub> (10)*

PMEH-Boc<sub>3</sub> (**10**) was prepared and purified as previously described before for PMBH-Boc<sub>3</sub>.<sup>2</sup>

*PMEH-C<sub>2</sub>-N<sub>3</sub> (11)*

PMEH-Boc<sub>3</sub> (0.10 g, 0.10 mmol) was dissolved in DCM (1 mL). In a separate flask, 2-azidoacetic acid (20 mg, 0.19 mmol) was dissolved in DCM (1 mL) and 2,4,6-trimethylpyridine (50  $\mu$ L, 0.38 mmol) was added. HCTU (79 mg, 0.19 mmol) HOBt (26 mg, 0.19 mmol) were dissolved in DMF (1 mL) and added to the 2-azidoacetic acid. Pre-activation was run for 5 min. at RT, after which the mixture of 2-azidoacetic acid and coupling agent was added to the flask containing PMEH-Boc<sub>3</sub>. The coupling reaction was run for 2-3 hours at RT under N<sub>2</sub> atmosphere. When needed, additional 2-azidoacetic acid and coupling agents were added and reaction time was extended. Once complete, the solvent was evaporated and the residue treated with TFA/TIPS/H<sub>2</sub>O (95:2.5:2.5, 4 mL) for 1.5 hours. The reaction mixture was added to ice-cold MTBE (40 mL). The resulting precipitate was washed with MTBE. Crude peptide was lyophilized from t-BuOH/H<sub>2</sub>O and HPLC purified. Yield: 41 mg, 0.05 mmol, 51%.

*General procedure for formation of triazoles (9a-9c, 12)*

The alkyne modified peptidomimetic  $\beta$ -hairpin **7** was prepared using the same on-resin method employed in the synthesis of macrocycle **6** (see experimental section of main manuscript) but starting from Rink amide resin loaded with Fmoc-propargyl-glycine. The formation of the triazole linked bicyclic conjugates followed a previously described<sup>3</sup> protocol: To a solution of the alkyne modified peptidomimetic  $\beta$ -hairpin **7** (20.0 mg, 12.1  $\mu$ mol, 1.0 eq) in t-BuOH:H<sub>2</sub>O (1:1, 1 mL) was added the polymyxin azide (**8a-8c, 11**) in 1.1 eq (19-22mg). Sodium ascorbate (0.25 mg, 1.2  $\mu$ mol, 0.1 eq) was then added followed by CuSO<sub>4</sub>·5H<sub>2</sub>O (0.15 mg, 6  $\mu$ mol, 0.05 eq). The mixture was stirred at room temperature for 1 hour at which time complete disappearance of starting materials was generally observed. The solution was diluted in 4 mL H<sub>2</sub>O and directly subjected to RP-HPLC purification. Following lyophilization, the triazole-linked conjugates were obtained as white powders in the following yields: **9a** (18mg 56%), **9b** (18mg 55%), **9c** (19 mg 60%), and **12** (21 mg 71%).

### Antibacterial Assays

Minimum inhibitory concentrations (MICs) were determined by broth microdilution according to CLSI guidelines.<sup>4</sup> Blood agar plates were inoculated with glycerol stocks of the chosen bacteria strains, followed by incubation for 16 hours at 37°C. Cation adjusted Mueller-Hinton broth (CAMHB) containing 10 mg.L<sup>-1</sup> Mg<sup>2+</sup> and 25 mg.L<sup>-1</sup> Ca<sup>2+</sup> was inoculated with individual colonies of the chosen bacteria, and incubated for 16 hours at 220 RPM. The peptides were dissolved in CAMHB, supplemented with polysorbate-80 (P-80 or Tween-80, sterile-filtered) at 0.002% v/v final concentration and serially diluted on polypropylene microtiter plates with a volume of 50 µL per well. Inoculated CAMHB (2x10<sup>5</sup> CFU.mL<sup>-1</sup>) was added to reach a total volume of 100 µL per well. The microtiter plates were sealed with an adhesive membrane and after 16 hours of incubation at 37°C and 220 RPM the wells were visually inspected for bacterial growth. All reported MIC values result from three or more measurements performed on multiple days.

**Table S1.** HRMS for all newly reported compounds

| Compound  | Chemical formula                                                  | Calculated [M+H] | Calculated [M+2H]/2 | Measured  |
|-----------|-------------------------------------------------------------------|------------------|---------------------|-----------|
| <b>3a</b> | C <sub>114</sub> H <sub>187</sub> N <sub>33</sub> O <sub>32</sub> | 2531.4098        | 1266.2088           | 1266.2085 |
| <b>3b</b> | C <sub>117</sub> H <sub>185</sub> N <sub>33</sub> O <sub>32</sub> | 2565.3942        | 1283.2010           | 1283.2017 |
| <b>6</b>  | C <sub>70</sub> H <sub>106</sub> N <sub>18</sub> O <sub>20</sub>  | 1519.7909        | 760.3994            | 760.3994  |
| <b>7</b>  | C <sub>75</sub> H <sub>111</sub> N <sub>19</sub> O <sub>21</sub>  | 1614.8280        | 807.9179            | 807.9180  |
| <b>8a</b> | C <sub>42</sub> H <sub>77</sub> N <sub>17</sub> O <sub>12</sub>   | 1012.6016        | 506.8047            | 506.8043  |
| <b>8b</b> | C <sub>45</sub> H <sub>83</sub> N <sub>17</sub> O <sub>12</sub>   | 1054.6485        | 527.8282            | 527.8278  |
| <b>8c</b> | C <sub>49</sub> H <sub>91</sub> N <sub>17</sub> O <sub>15</sub>   | 1158.6959        | 579.8519            | 579.8515  |
| <b>9a</b> | C <sub>117</sub> H <sub>188</sub> N <sub>36</sub> O <sub>33</sub> | 2626.4218        | 1313.7148           | 1313.7106 |
| <b>9b</b> | C <sub>120</sub> H <sub>194</sub> N <sub>36</sub> O <sub>33</sub> | 2668.4687        | 1334.7383           | 1334.7359 |
| <b>9c</b> | C <sub>124</sub> H <sub>202</sub> N <sub>36</sub> O <sub>36</sub> | 2772.5161        | 1386.7619           | 1386.7555 |
| <b>11</b> | C <sub>34</sub> H <sub>62</sub> N <sub>14</sub> O <sub>9</sub>    | 811.4902         | 406.2491            | 811.4903  |
| <b>12</b> | C <sub>109</sub> H <sub>173</sub> N <sub>33</sub> O <sub>32</sub> | 2425.3104        | 1213.1591           | 1213.1577 |

## Analytical HPLC traces

**3a**

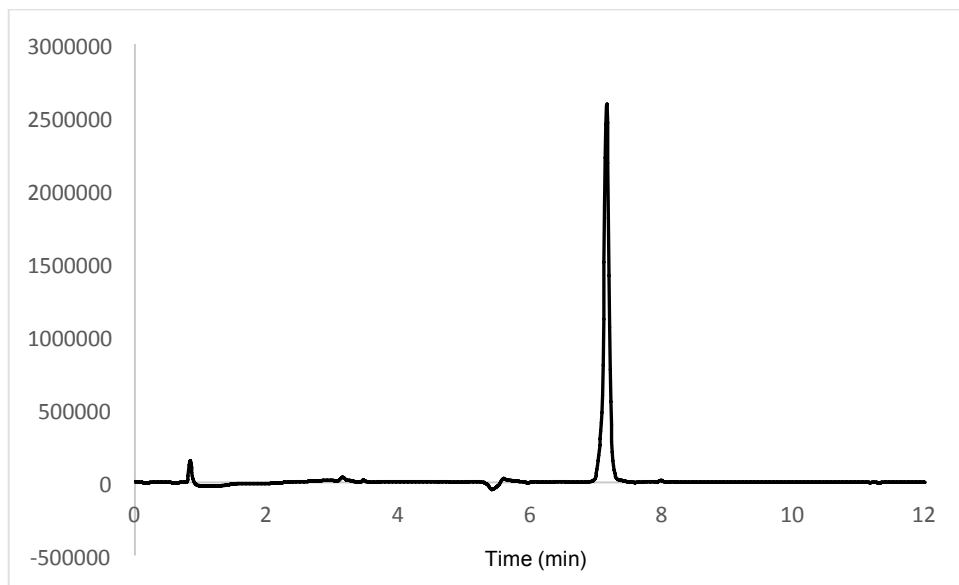

**3b**

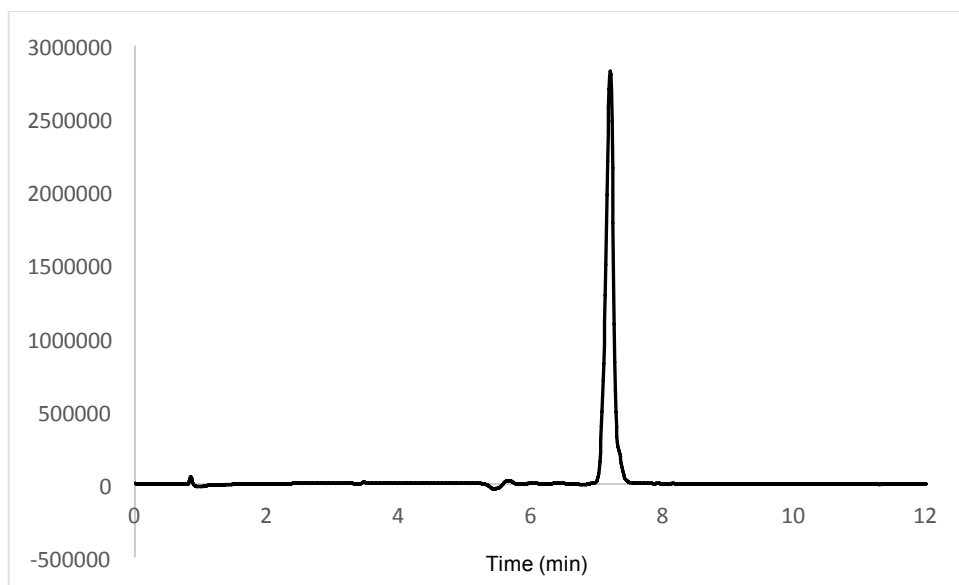

6

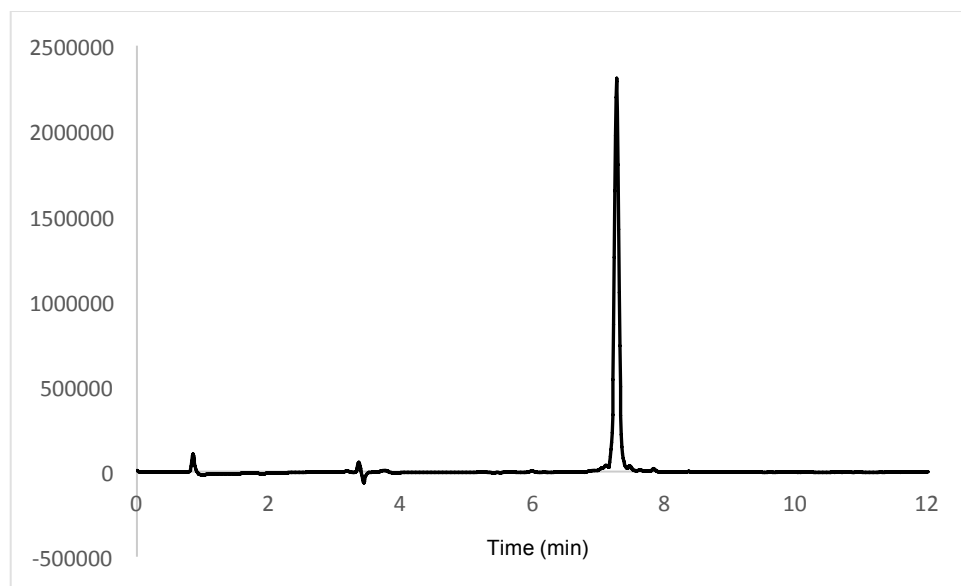

7

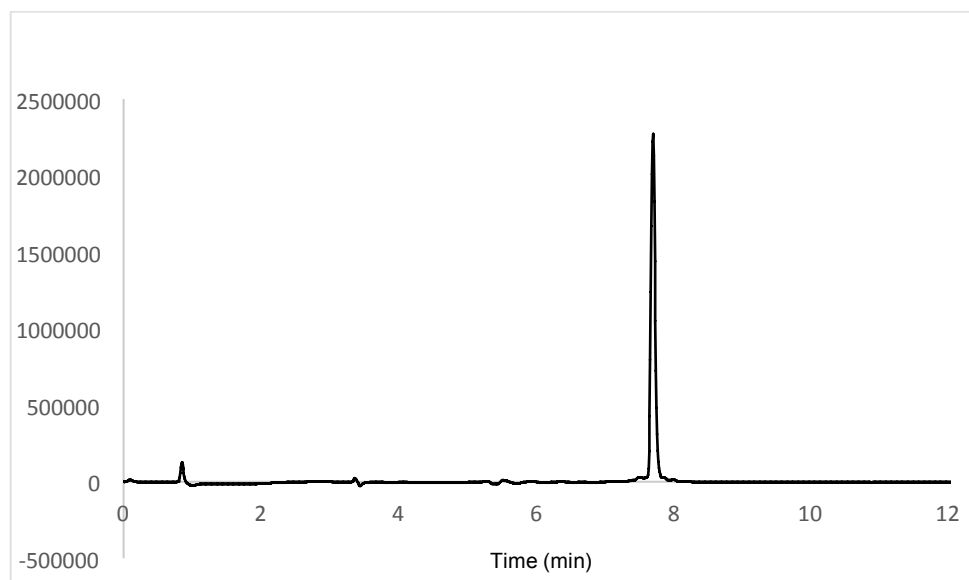

**8a**

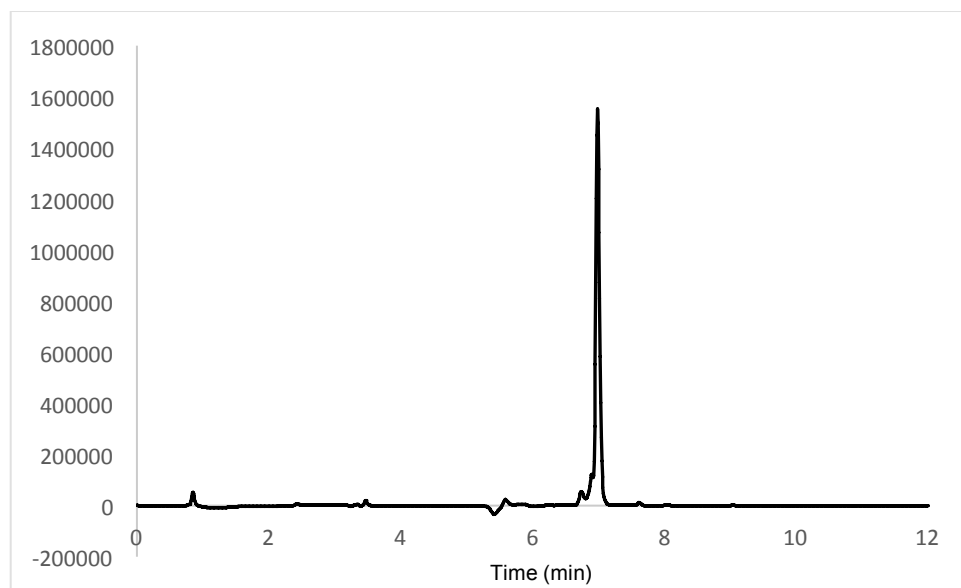

**8b**

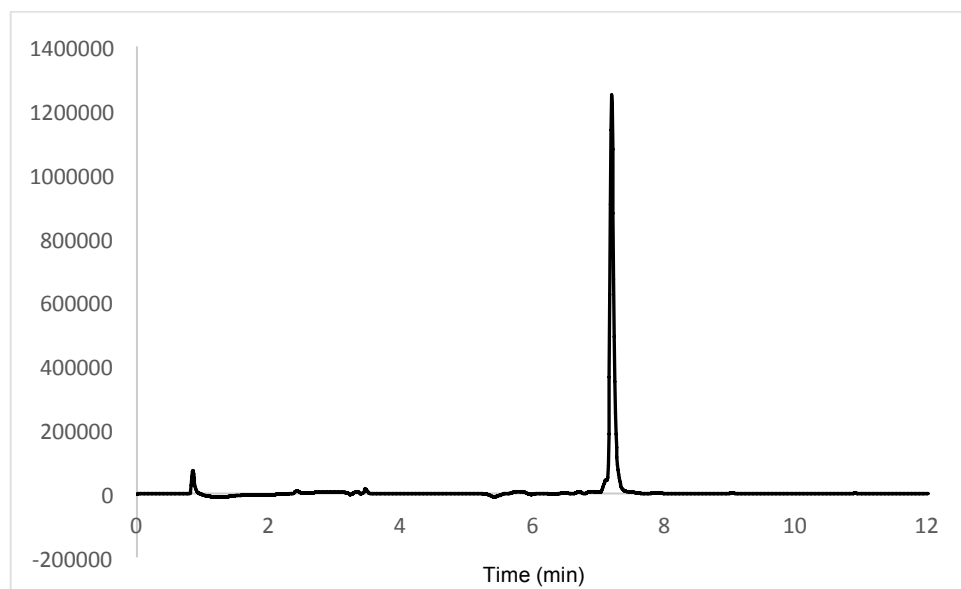



**8c**

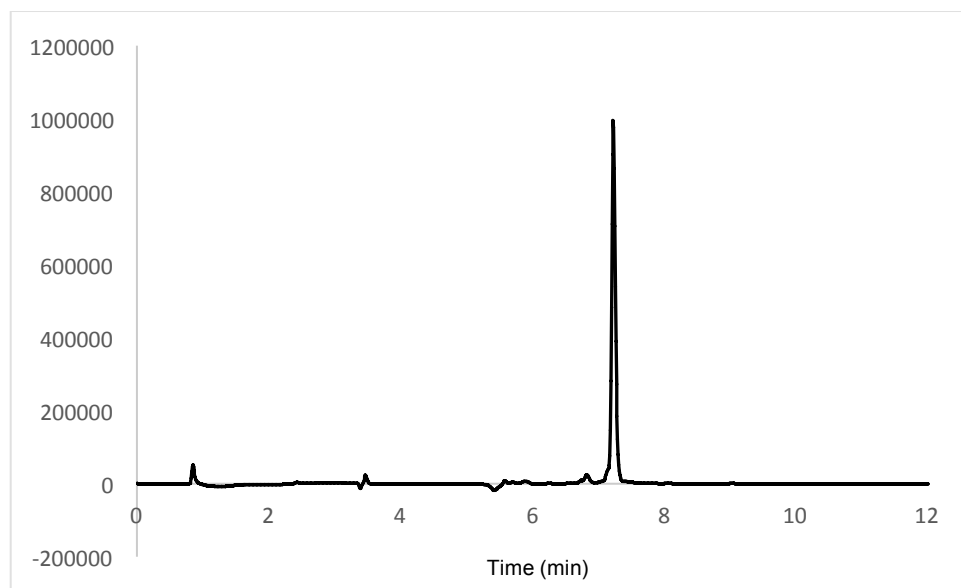

**9a**

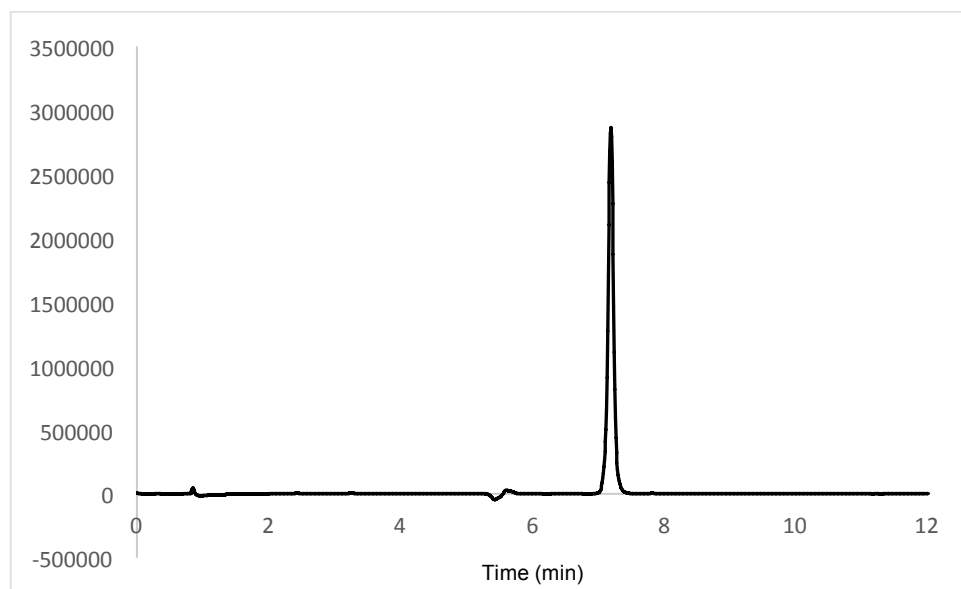

**9b**

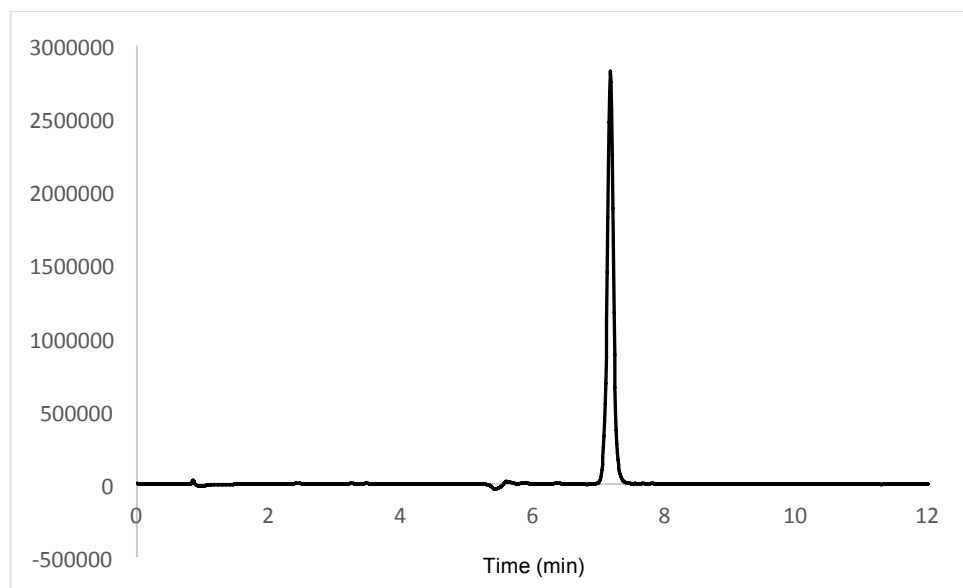

**9c**

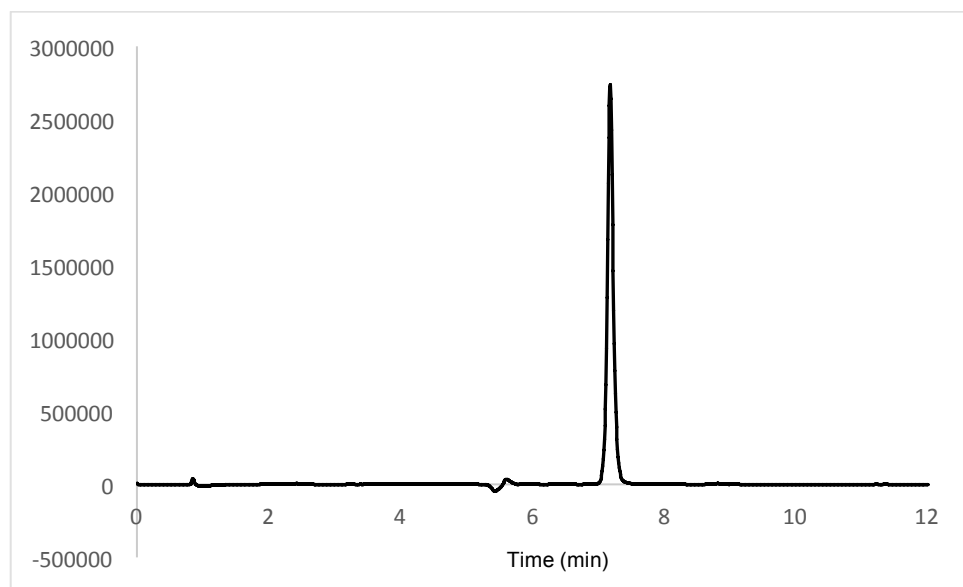

11

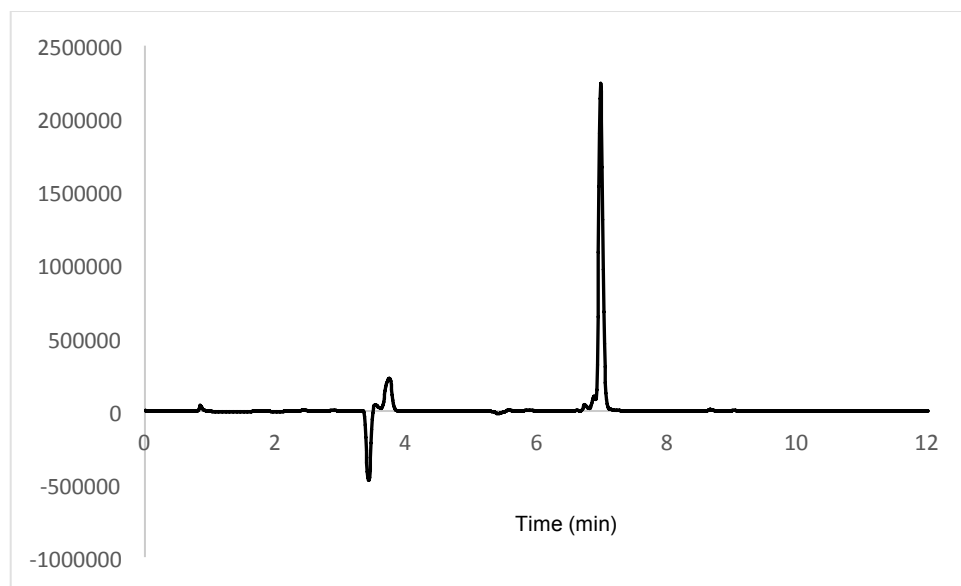

12

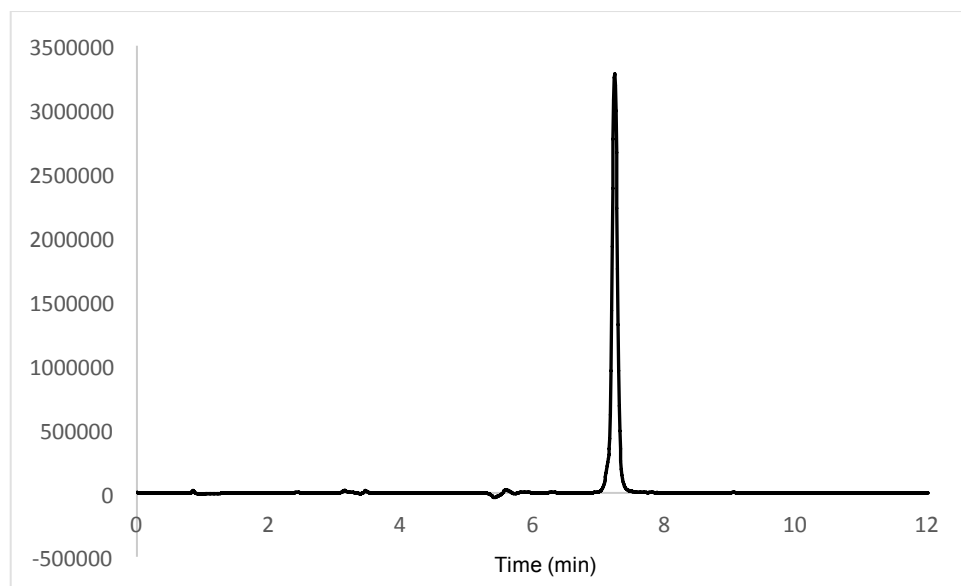

## References

- (1) O'Dowd, H.; Kim, B.; Margolis, P.; Wang, W.; Wu, C.; Lopez, S. L.; Blais, J. Preparation of Tetra-Boc-Protected Polymyxin B Nonapeptide. *Tetrahedron Lett.* **2007**, *48* (11), 2003–2005.
- (2) Li, B.; Akin, A.; Magee, T. V.; Martinez, C.; Szeliga, J.; Vuong, D. V. Syntheses of Dap-3 Polymyxin Analogues via a Tris-Boc-Protected Polymyxin B Heptapeptide. *Synth.* **2015**, *47* (14), 2088–2092.
- (3) Silverman, S. M.; Moses, J. E.; Sharpless, K. B. Reengineering Antibiotics to Combat Bacterial Resistance: Click Chemistry [1,2,3]-Triazole Vancomycin Dimers with Potent Activity against MRSA and VRE. *Chem. - A Eur. J.* **2017**, *23* (1), 79–83.
- (4) Abmm, D.; Tamma, D.; Kirn, J.; Cullen, S. K. Clinical and Laboratory Standards Institute (CLSI). Performance Standards for Antimicrobial Susceptibility Testing. 30th Ed. *CLSI Suppl. M100 2020*, Wayne, PA
